# Supplementary material
Source: MDPI journal article supplement (https://www.mdpi.com/2504-477X/5/6/162)
Supplement: s1 [file s1]

# Supplementary Material: A Comprehensive Review of Polymeric Wastewater Purification Membranes

Rasmeet Singh <sup>1\*</sup>, Mandeep Singh <sup>2</sup>, Nisha Kumari <sup>3</sup>, Janak <sup>3</sup>, Sthitapragyan Maharana <sup>2</sup>, and Pragyansu Maharana <sup>2</sup>

<sup>1</sup> Dr. S.S. Bhatnagar University Institute of Chemical Engineering & Technology, Panjab University, Chandigarh 160 014, India; [srasmeet9@gmail.com](mailto:srasmeet9@gmail.com) (R.S.)

<sup>2</sup> School of Mechanical and Mechatronic Engineering, University of Technology Sydney, 15 Broadway, Ultimo, NSW 2007, Australia; [Mandeep.Singh@uts.edu.au](mailto:Mandeep.Singh@uts.edu.au) (M.S.); [sthitapragyan.maharana@student.uts.edu.au](mailto:sthitapragyan.maharana@student.uts.edu.au) (S.M.); [pragyansu.maharana@student.uts.edu.au](mailto:pragyansu.maharana@student.uts.edu.au) (P.M.)

<sup>3</sup> Dr. B.R. Ambedkar National Institute of Technology Jalandhar, Punjab 144011, India; [nishusharma231115@gmail.com](mailto:nishusharma231115@gmail.com) (N.K.); [jk199chauhan@gmail.com](mailto:jk199chauhan@gmail.com) (J.)

\* Correspondence: [srasmeet9@gmail.com](mailto:srasmeet9@gmail.com)

Table S1. Important developments in the field of wastewater purification using different CNTs.

| CNTs                                              | Modification technique                                | Target contaminants                             | Adsorption capacity                         | Reference |
|---------------------------------------------------|-------------------------------------------------------|-------------------------------------------------|---------------------------------------------|-----------|
| MWCNTs                                            | -                                                     | Eriochrome cyanine R                            | 73.18 mg/g                                  | [1]       |
| Granular CNTs                                     | Al <sub>2</sub> O <sub>3</sub> was bonded with g-CNTs | Diclofenac sodium and carbamazepine             | 157.4 and 106.5 µmol/g                      | [2]       |
| MWCNTs                                            | Alkali-activated                                      | Magnetic carbon (MO) & Methylene blue (MB)      | MO: 2-10<br>MB: less than 4 and more than 8 | [3]       |
| SWCNTs                                            | -                                                     | Bisphenol A and 17α-ethinyl estradiol           | 75-98%                                      | [4]       |
| SWCNTs & MWCNTs                                   | Carboxylated                                          | Oseltamivir carboxylate (OC) & Oseltamivir (OE) | OC: 6-8<br>OE: alkaline                     | [5]       |
| MWCNTs                                            | Grafted with PAAM                                     | Humic acid                                      | 80-85%                                      | [6]       |
| Polypyrrole/CNTs-CoFe <sub>2</sub> O <sub>4</sub> | one-pot solvothermal method                           | Methyl blue                                     | 500 mg/L                                    | [7]       |

|                                     |                    |              |     |     |
|-------------------------------------|--------------------|--------------|-----|-----|
| HO <sub>2</sub> O <sub>3</sub> /CNT | MOF assisted route | Tetracycline | 98% | [8] |
|-------------------------------------|--------------------|--------------|-----|-----|

Table S2: Adsorption capacities of various GO-based adsorbents.

| GO adsorbent                        | Targeted contaminant        | Adsorption capacity | Reference |
|-------------------------------------|-----------------------------|---------------------|-----------|
| PEI-GO                              | Pb(II)                      | 1000 mg/g           | [9]       |
| GO-MnFe <sub>2</sub> O <sub>4</sub> | Pb(II), As(V), As(III)      | 673, 207, 146 mg/g  | [10]      |
| GO-Fe <sub>3</sub> O <sub>4</sub>   | Methyl blue and neutral red | 167.2, 171.3 mg/g   | [11]      |
| PVP-RGO                             | Cu(II)                      | 539.53 mg/g         | [12]      |
| rGO/ZnO                             | Methyl blue                 | 80%                 | [13]      |
| GO/BNC                              | Congo red and Basic blue    | 99% and 96%         | [14]      |

Table S3: Comparison for merits and demerits of different metal/metal oxide nanoparticles infused membranes.

| Sr. No | Membrane material | Advantages                                              | Disadvantages                                                                                   | References |
|--------|-------------------|---------------------------------------------------------|-------------------------------------------------------------------------------------------------|------------|
| 1      | Aluminum          | Enhanced mechanical strength and antifouling mechanism. | Highly sensitive membranes and can slow down the process with excessive nanoparticles addition. | [15]       |

|   |           |                                                                                                                   |                                                                                                                                 |         |
|---|-----------|-------------------------------------------------------------------------------------------------------------------|---------------------------------------------------------------------------------------------------------------------------------|---------|
| 2 | Zirconium | High water retention, capable of treating high salinity liquids, stable in humid and high temperature conditions. | Highly sensitive to fouling and excessive nanoparticles concentration.                                                          | [15]    |
| 3 | Silver    | Highly stable, highly antimicrobial against bacteria, nontoxic, and antifungal.                                   | Interfering of salts and antimicrobial mechanism happens due to excessive release/concentration of silver ions from metal form. | [16]    |
| 4 | Magnesium | Antibacterial, nontoxic, biocompatible, and follow systematic resistance against various bacteria.                | Sensitive to high temperatures, poor corrosion resistance, and less mechanical stability.                                       | [17,18] |
| 5 | Copper    | Biocidal, resistance to corrosion and biofouling, good photo catalyst.                                            | Low modification stability, uncontrolled release of copper ions, and leaching of copper materials.                              | [19]    |

## References

- Ghaedi, M.; Shokrollahi, A.; Hossainian, H.; Kokhdan, S.N. Comparison of activated carbon and multiwalled carbon nanotubes for efficient removal of eriochrome cyanine R (ECR): Kinetic, isotherm, and thermodynamic study of the removal process. *J. Chem. Eng. Data*. **2011**, *56*, 3227–3235. doi: [doi.org/10.1021/je200331u](https://doi.org/10.1021/je200331u)
- Wei, H.; Deng, S.; Huang, Q.; Nie, Y.; Wang, B.; Huang, J.; Yu, G. Regenerable granular carbon nanotubes/alumina hybrid adsorbents for diclofenac sodium and carbamazepine removal from aqueous solution. *Water Res.* **2013**, *47*, 4139–4147. doi: [10.1016/j.watres.2012.11.062](https://doi.org/10.1016/j.watres.2012.11.062)
- Ma, J.; Yu, F.; Zhou, L.; Jin, L.; Yang, M.; Luan, J.; Tang, Y.; Fan, H.; Yuan, Z.; Chen, J. Enhanced adsorptive removal of methyl orange and methylene blue from aqueous solution by alkali-activated multiwalled carbon nanotubes. *ACS Appl. Mater. Interf.* **2012**, *4*, 5749–5760. doi: [10.1021/am301053m](https://doi.org/10.1021/am301053m)
- Joseph, L.; Heo, J.; Park, Y.G.; Flora, J.R.; Yoon, Y. Adsorption of bisphenol A and 17 $\alpha$ -ethinyl estradiol on single walled carbon nanotubes from seawater and brackish water. *Desalination* **2011**, *281*, 68–74. doi: [10.1016/j.desal.2011.07.044](https://doi.org/10.1016/j.desal.2011.07.044)
- Wang, W.L.; Wu, Q.Y.; Wang, Z.M.; Niu, L.X.; Wang, C.; Sun, M.C.; Hu, H.Y. Adsorption removal of antiviral drug oseltamivir and its metabolite oseltamivir carboxylate by carbon nanotubes: Effects of carbon nanotube properties and media. *J. Environ. Manage.* **2015**, *162*, 326–333. Doi: [10.1016/j.jenvman.2015.07.043](https://doi.org/10.1016/j.jenvman.2015.07.043)
- Yang, S.; Hu, J.; Chen, C.; Shao, D.; Wang, X. Mutual effects of Pb (II) and humic acid adsorption on multiwalled carbon nanotubes/polyacrylamide composites from aqueous solutions. *Environ. Sci. Technol.* **2011**, *45*, 3621–3627. doi: [10.1021/es104047d](https://doi.org/10.1021/es104047d)
- Li, X.; Lu, H.; Zhang, Y.; He, F. Efficient removal of organic pollutants from aqueous media using newly synthesized polypyrrole/CNTs-CoFe<sub>2</sub>O<sub>4</sub> magnetic nanocomposites. *Chem. Eng. J.* **2017**, *316*, 893–902. doi: [10.1016/j.cej.2017.02.037](https://doi.org/10.1016/j.cej.2017.02.037)

8. Jiang, Z.; Feng, L.; Zhu, J.; Li, X.; Chen, Y.; Khan, S. MOF assisted synthesis of a  $\text{H}_2\text{O}_3/\text{CNT}$  nanocomposite photocatalyst for organic pollutants degradation. *Ceramics Intern.* **2020**, *46*, 19084–19091. doi: [10.1016/j.ceramint.2020.04.242](https://doi.org/10.1016/j.ceramint.2020.04.242)
9. Chen, C.; Li, D.; Shao, X. High-performance nanocomposite films: reinforced with chitosan nanofiber extracted from prawn shells. *J. Mater. Sci.* **2014**, *49*, 1215–1221. doi: [10.1007/s10853-013-7803-x](https://doi.org/10.1007/s10853-013-7803-x)
10. Kumar, S.; Nair, R.R.; Pillai, P.B.; Gupta, S.N.; Iyengar, M.A.; Sood, A.K. Graphene oxide– $\text{MnFe}_2\text{O}_4$  magnetic nanohybrids for efficient removal of lead and arsenic from water. *ACS Appl. Mater. Interf.* **2014**, *6*, 17426–17436. doi: [10.1021/am504826q](https://doi.org/10.1021/am504826q)
11. Xie, G.; Xi, P.; Liu, H.; Chen, F.; Huang, L.; Shi, Y.; Hou, F.; Zeng, Z.; Shao, C.; Wang, J. A facile chemical method to produce superparamagnetic graphene oxide– $\text{Fe}_3\text{O}_4$  hybrid composite and its application in the removal of dyes from aqueous solution. *J. Mater. Chem.* **2012**, *22*, 1033–1039. doi: [10.1039/C1JM13433G](https://doi.org/10.1039/C1JM13433G)
12. Zhang, Y.; Chi, H.; Zhang, W.; Sun, Y.; Liang, Q.; Gu, Y.; Jing, R. Highly efficient adsorption of copper ions by a PVP-reduced graphene oxide based on a new adsorptions mechanism. *Nanomicro Lett.* **2014**, *6*, 80–87. doi: [10.5101/nml.v6i1.p80-87](https://doi.org/10.5101/nml.v6i1.p80-87)
13. Naseem, T.; Waseem, M.; Hafeez, M.; Din, S.U.; Haq, S. Reduced graphene oxide/zinc oxide nanocomposite: from synthesis to its application for wastewater purification and antibacterial activity. *J Inorg Organomet Polym Mater* **2020**, *30*, 3907–3919. doi: [10.1007/s10904-020-01529-2](https://doi.org/10.1007/s10904-020-01529-2)
14. Zhong, Y.; Mahmud, S.; He, Z.; Yang, Y.; Zhang, Z.; Guo, F.; Chen, Z.; Xiong, Z.; Zhao, Y. Graphene oxide modified membrane for highly efficient wastewater treatment by dynamic combination of nanofiltration and catalysis. *J. Hazard. Mater.* **2020**, *397*, 122774. doi: [10.1016/j.jhazmat.2020.122774](https://doi.org/10.1016/j.jhazmat.2020.122774)
15. Bashambu, L.; Singh, R.; Verma, J. Metal/metal oxide nanocomposite membranes for water purification. *Mater. Today Proc.* **2021**, *44*, 538–455. doi: [10.1016/j.matpr.2020.10.213](https://doi.org/10.1016/j.matpr.2020.10.213)
16. Kim, J.S.; Kuk, E.; Yu, K.N.; Kim, J.H.; Park, S.J.; Lee, H.J.; Kim, S.H.; Park, Y.K.; Park, Y.H.; Hwang, C.Y.; Kim, Y.K. Antimicrobial effects of silver nanoparticles. *Nanomed. Nanotechnol.* **2007**, *3*, 95–101. doi: [10.1016/j.nano.2006.12.001](https://doi.org/10.1016/j.nano.2006.12.001)
17. Hu, H.; Nie, X.; Ma, Y. Corrosion and surface treatment of magnesium alloys. In *Magnesium Alloys-Properties in Solid and Liquid States*. 2014, 67–108. Available online: <https://www.intechopen.com/books/magnesium-alloys-properties-in-solid-and-liquid-states/corrosion-and-surface-treatment-of-magnesium-alloys> (accessed on 21 June 2021).
18. Lei, Y.; Hidayat, I.; Saakes, M.; van der Weijden, R.; Buisman, C.J. Fate of calcium, magnesium and inorganic carbon in electrochemical phosphorus recovery from domestic wastewater. *Chem. Eng. J.* **2019**, *362*, 453–459. doi: [10.1016/j.cej.2019.01.056](https://doi.org/10.1016/j.cej.2019.01.056)
19. García, A.; Rodríguez, B.; Giraldo, H.; Quintero, Y.; Quezada, R.; Hassan, N.; Estay, H. Copper-Modified Polymeric Membranes for Water Treatment: A Comprehensive Review. *Membranes*. **2021**, *11*, 93. doi: [10.3390/membranes11020093](https://doi.org/10.3390/membranes11020093)
